# Supplementary material
Source: publisher figshare collection journal article supplement (https://frontiersin.figshare.com/ndownloader/files/13542401)
Supplement: Supplementary file [file 13542401]

**APPENDIX A: Four-factor solution and item loadings for the CBI-brazilian version (Promax rotation). CBI factors (F1-positive thinking, F2-negative thinking, F3-avoidance/ distraction and F4- social support).**

| <b>Factor</b>                                                                                     | <b>F1</b>  | <b>F2</b> | <b>F3</b> | <b>F4</b>  |
|---------------------------------------------------------------------------------------------------|------------|-----------|-----------|------------|
| 1. Thinking about how much better off I am without drinking.                                      | <b>.43</b> | .06       | -.09      | .07        |
| 2. Telephoning a friend. *                                                                        | .31        | -.09      | .21       | -.01       |
| 3. Keeping in the company of non drinkers.                                                        | .28        | -.15      | -.08      | <b>.45</b> |
| 4. Thinking positively                                                                            | <b>.52</b> | -.10      | -.08      | .25        |
| 5. Thinking of the mess I've got myself into through drinking. *                                  | .35        | .28       | .05       | -.15       |
| 6. Stopping to examine my motives and eliminating the false ones                                  | <b>.54</b> | .00       | .02       | -.06       |
| 7. Thinking of the promises I've made to others.*                                                 | .35        | .14       | .19       | -.10       |
| 8. Staying indoors – hiding.*                                                                     | -.18       | .22       | .28       | .02        |
| 9. Pausing and really thinking the whole alcoholic cycle through.                                 | <b>.50</b> | .22       | .00       | -.15       |
| 10. Leaving my money at home.*                                                                    | -.02       | .07       | .26       | .02        |
| 11. Recognizing that life is no bed of roses but drink is not the answer.                         | <b>.55</b> | .14       | -.11      | .00        |
| 12. Going to an A.A. meeting.*                                                                    | .16        | -.00      | .19       | -.01       |
| 13. Knowing that by not drinking I can show my face again without fear of what others will think. | <b>.47</b> | .11       | .03       | .04        |
| 14. Cheering myself up by buying myself something special instead.                                | .43        | -.02      | .14       | .02        |
| 15. Facing up to my bad feelings instead of trying to drown them.                                 | <b>.55</b> | -.05      | .07       | -.00       |
| 16. Working harder*                                                                               | .35        | -.08      | .25       | .01        |
| 17. Realizing it's just not worth it                                                              | <b>.42</b> | .15       | -.10      | .18        |

|                                                                               |            |            |            |            |
|-------------------------------------------------------------------------------|------------|------------|------------|------------|
| 18. Waiting it out until everything is shut.                                  | -.04       | .07        | <b>.49</b> | .08        |
| 19. Remembering how I've let my friends and family down in the past.          | -.04       | <b>.62</b> | .15        | -.05       |
| 20. Keeping away from people who drink.                                       | -.04       | .04        | .09        | <b>.56</b> |
| 21. Going for a walk.*                                                        | .31        | -.23       | .13        | .19        |
| 22. Looking on the bright side and trying to stop making excuses for myself.* | .32        | .27        | -.03       | .15        |
| 23. Realizing it's affecting my health.                                       | .05        | .57        | .06        | .00        |
| 24. Start doing something in the house.                                       | .10        | .05        | .12        | <b>.40</b> |
| 25. Considering the effect it will have on my family.                         | .16        | <b>.57</b> | -.01       | -.01       |
| 26. Reminding myself of the good life I can have without drink.               | .05        | .59        | -.13       | .10        |
| 27. Getting in touch with old drinking friends who are better now*            | .23        | -.00       | .28        | .01        |
| 28. Making up my mind that I'm going to stop playing games with myself.*      | .20        | .23        | -.06       | .35        |
| 29. Eating a good meal. *                                                     | .22        | .06        | .21        | .06        |
| 30. Avoiding places where I drank.                                            | -.19       | .05        | .16        | <b>.70</b> |
| 31. Thinking about all the people who have helped me.                         | -.09       | <b>.54</b> | .07        | .16        |
| 32. Saying I am well and wish to stay so.*                                    | .20        | .05        | -.07       | .38        |
| 33. Going to sleep.                                                           | -.01       | -.05       | <b>.47</b> | .16        |
| 34. Remembering how it has affected my family.                                | -.01       | <b>.72</b> | .02        | -.06       |
| 35. Forcing myself to go to work.                                             | .22        | -.01       | <b>.42</b> | -.08       |
| 36. Trying to face life instead of avoiding it.                               | <b>.43</b> | .06        | .00        | .13        |

**\*Saturation >.40**
